# Supplementary material for: Biohybrid microrobots with a Spirulina skeleton and MOF skin for efficient organic pollutant adsorption
Source: Royal Society of Chemistry journal article supplement (doi:10.1039/d4nr04626a), 2025-01-01
Supplement: d4nr04626a1.pdf [file d4nr04626a1.pdf]

## Supplementary Information

### Biohybrid Microrobots with Spirulina Skeleton and MOFs Skin for Efficient Organic Pollutant Adsorption

Yongcheng Li,<sup>a#</sup> Dajian Li,<sup>a#</sup> Yuhong Zheng,<sup>a#</sup> Sirui Lu,<sup>c</sup> Yuepeng Cai<sup>\*a</sup> and Renfeng Dong<sup>\*a,b</sup>

a. School of Chemistry, South China Normal University, Guangzhou 510006, China.

b. School of Chemistry and Chemical Engineering, Lingnan Normal University, Zhanjiang 524048, China.

c. Guangzhou Olympic Secondary School, Guangzhou 510645, China

\*Corresponding Author: E-mail: [rfdong@m.scnu.edu.cn](mailto:rfdong@m.scnu.edu.cn); [caiyp@scnu.edu.cn](mailto:caiyp@scnu.edu.cn)

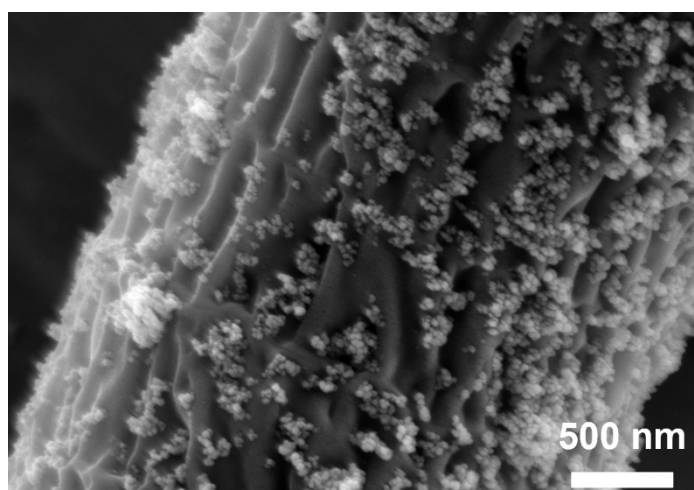

Figure S1. SEM image of the local location of Spirulina@Fe<sub>3</sub>O<sub>4</sub> composite microrobots, scale bar: 500 nm.

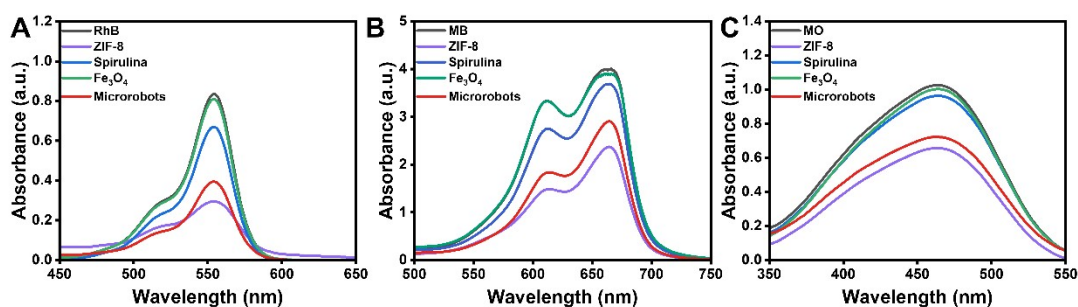

Figure S2. (A-C) Comparison of UV Visible Spectral Absorption of ZIF-8, Spirulina, Fe<sub>3</sub>O<sub>4</sub>, and Spirulina@MOFs microrobots under Rhodamine B, Methylene Blue, and Methyl Orange Dyes.

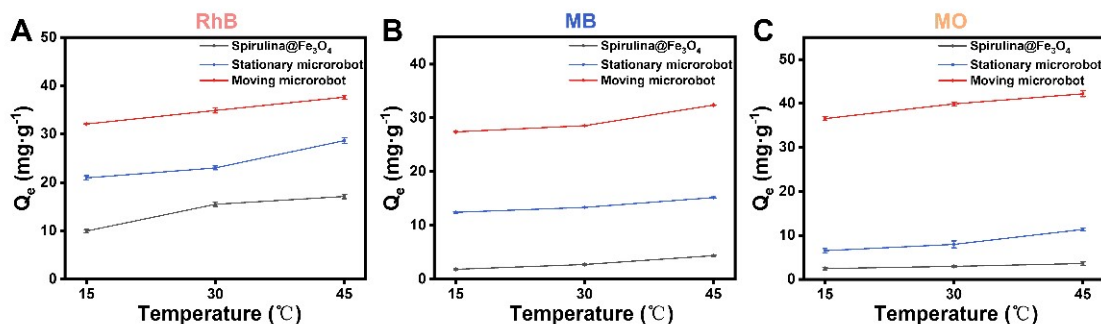

**Figure S3.** (A-C) Adsorption capacities of Spirulina@Fe<sub>3</sub>O<sub>4</sub>, mobile microrobots, and fixed microrobots under Rhodamine B, Methylene Blue, and Methyl Orange dyes as a function of temperature

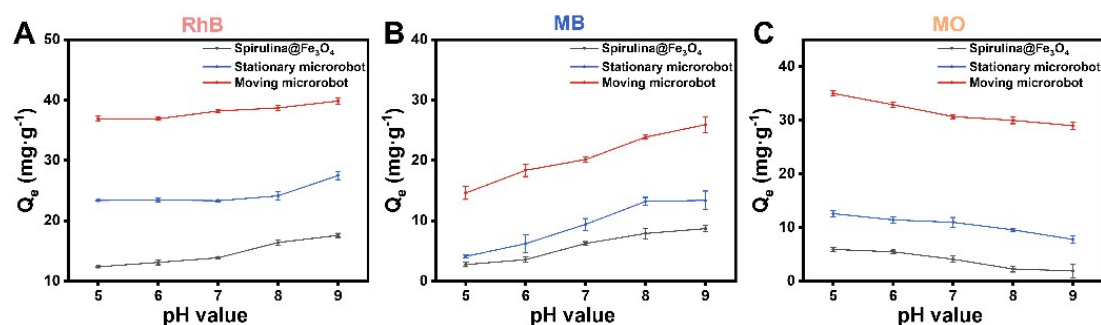

**Figure S4.** (A-C) Adsorption capacities of Spirulina@Fe<sub>3</sub>O<sub>4</sub>, mobile microrobots, and fixed microrobots under Rhodamine B, Methylene Blue, and Methyl Orange dyes as a function of pH value.

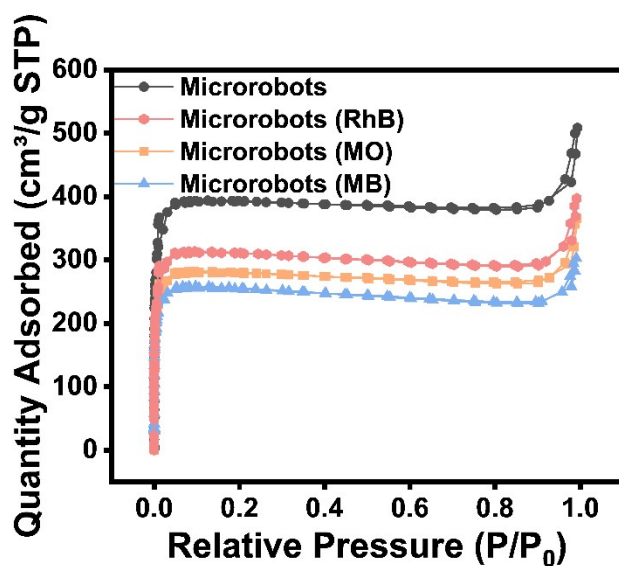

**Figure S5.** (F) N<sub>2</sub> adsorption-desorption isotherms of Spirulina@MOFs microrobots and Spirulina@MOFs microrobots after cycling with different dyes

**Table 1.** Maximum adsorption capacity of RhB by different adsorbents

| Adsorbent  | Time (min) | Adsorption capacity (mg/g) | References |
|------------|------------|----------------------------|------------|
| 2D A-ZIF-8 | 60         | 46.5                       | 1          |

|                |     |        |           |
|----------------|-----|--------|-----------|
| ZIF-8@ZIF-67   | 120 | 143.26 | 2         |
| ZIF-CZIF-867   | 75  | 137.1  | 3         |
| Zn/Co@C-800    | 250 | 92.72  | 4         |
| US1            | 120 | 25     | 5         |
| Spirulina@MOFs | 10  | 47.77  | This work |

**Table 2.** Maximum adsorption capacity of MB by different adsorbents

| Adsorbent                                    | Time (min) | Adsorption capacity (mg/g) | References |
|----------------------------------------------|------------|----------------------------|------------|
| US1                                          | 120        | 46.6                       | 5          |
| plant essential oils@ $\gamma$ -<br>CD/ZIF-8 | 200        | 111.6                      | 6          |
| ZIF-8 (AA)                                   | 120        | 12.51                      | 7          |
| CuS/Zeolite A/ZIF-8                          | 60         | 12.45                      | 8          |
| NZIF                                         | 30         | 9.7                        | 9          |
| Spirulina@MOFs                               | 10         | 31.03                      | This work  |

**Table 3.** Maximum adsorption capacity of MO by different adsorbents

| Adsorbent      | Time (min) | Adsorption capacity (mg/g) | References |
|----------------|------------|----------------------------|------------|
| ZIF-8          | 60         | 45.83                      | 10         |
| Mn@ZIF-8       | 360        | 55.03                      | 11         |
| 2D A-ZIF-8     | 60         | 46.3                       | 1          |
| SA/PVA/ZIF-8   | 180        | 20.83                      | 12         |
| US1            | 120        | 10.1                       | 5          |
| Spirulina@MOFs | 10         | 31.03                      | This work  |

1. S. Wang, L. Luo, Z. Li, C. Jin, N. Wang, D. Wang, A. Wu, H. Yan, L. Wang and C. Tian, *J Hazard Mater*, 2022, **430**, 128501.
2. M. A. Nazir, T. Najam, K. Shahzad, M. A. Wattoo, T. Hussain, M. K. Tufail, S. S. A. Shah and A. u. Rehman, *Surfaces and Interfaces*, 2022, **34**, 102324.

3. J. Zhang, X. Hu, X. Yan, R. Feng, M. Zhou and J. Xue, *Colloids and Surfaces A: Physicochemical and Engineering Aspects*, 2019, **575**, 10-17.
4. H. Zhao, Y. Wang and L. Zhao, *European Journal of Inorganic Chemistry*, 2017, **2017**, 4110-4116.
5. B. Luan-Tran, H.-Y. Chin, B. K. Chang and A. S. T. Chiang, *Microporous and Mesoporous Materials*, 2019, **277**, 149-153.
6. X. Huang, X. Fu, F. Li, Y. Zhang, X. Huang, S. Xu, Y. Chen, J. Qi, J. Xie and C. F. de-Hoop, *Materials Letters*, 2024, **376**, 137289.
7. E. Santoso, R. Ediati, Z. Istiqomah, D. O. Sulistiono, R. E. Nugraha, Y. Kusumawati, H. Bahruji and D. Prasetyoko, *Microporous and Mesoporous Materials*, 2021, **310**, 110620.
8. D. Ren, B. Zhu, J. Xiong, K. Huang, M. Cai, C. Liu, X. Bai, T. Liu, X. Zhang and B. Zou, *J Colloid Interface Sci*, 2024, **669**, 804-815.
9. X. Wu, J. Xiong, S. Liu, J. H. Cheng, M. H. Zong and W. Y. Lou, *J Hazard Mater*, 2021, **417**, 126011.
10. Y. Ding, Y. Xu, B. Ding, Z. Li, F. Xie, F. Zhang, H. Wang, J. Liu and X. Wang, *Colloids and Surfaces A: Physicochemical and Engineering Aspects*, 2017, **520**, 661-667.
11. M. A. Nazir, M. F. Elsadek, S. Ullah, I. Hossain, T. Najam, S. Ullah, N. Muhammad, S. S. A. Shah and A. u. Rehman, *Inorganic Chemistry Communications*, 2024, **165**, 112294.
12. N. A. M. M. Phu, E. Wi, G. Jeong, H. Kim, N. R. Singha and M. Chang, *Carbohydrate Polymers*, 2025, **350**, 123016.
